# Supplementary material
Source: publisher figshare collection journal article supplement (https://acs.figshare.com/ndownloader/files/17948102)
Supplement: Supplementary file 1 [file 17948102]

# Surface Carbon Hydrogenation on Pre-covered Fe(110) with Spectators- Coverage-Dependent Chain Initiation and Propagation

Teng Li,<sup>a,b,c</sup> Xiaodong Wen<sup>a,c</sup> Yong-Wang Li,<sup>a,c</sup> and Haijun Jiao<sup>a,d\*</sup>

(a) State Key Laboratory of Coal Conversion, Institute of Coal Chemistry, Chinese Academy of Sciences, Taiyuan, 030001, China; (b) University of Chinese Academy of Sciences, No. 19A Yuquan Road, Beijing, 100049, PR China; (c) National Energy Center for Coal to Liquids, Synfuels China Co., Ltd, Huairou District, Beijing, 101400, China; (d) Leibniz-Institut für Katalyse e.V. an der Universität Rostock, Albert-Einstein Strasse 29a, 18059 Rostock, Germany. haijun.jiao@catalysis.de

## Content

|                                                                                                                                                                                                                                          |     |
|------------------------------------------------------------------------------------------------------------------------------------------------------------------------------------------------------------------------------------------|-----|
| <b>Table S1</b> Reactions summary of ethane and propane formation                                                                                                                                                                        | S2  |
| <b>Table S2</b> Temperature effects on the reaction energies of ethylene and ethane formation                                                                                                                                            | S3  |
| <b>Table S3</b> Structure parameters as carbon coverage variation on (4×4) Fe(110)                                                                                                                                                       | S4  |
| <b>Table S4</b> Comparison of the barriers and reaction energies under high and low coverage                                                                                                                                             | S4  |
| <b>Figure S1</b> Thermodynamic properties of stepwise hydrogenation to methane of surface carbon including hydrogen adsorption and methane desorption                                                                                    | S5  |
| <b>Figure S2</b> Thermodynamic properties of CH-CH coupling and hydrogenation to CH <sub>2</sub> CH as well as CH <sub>2</sub> +CH coupling                                                                                              | S6  |
| <b>Figure S3</b> Thermodynamic properties of ethylene and CH <sub>3</sub> CH formation                                                                                                                                                   | S6  |
| <b>Figure S4</b> Thermodynamic properties of ethylene stepwise hydrogenation to ethane and coupling of two CH <sub>3</sub>                                                                                                               | S7  |
| <b>Figure S5</b> Reactions of CH+CH coupling to acetylene and CH hydrogenation                                                                                                                                                           | S8  |
| <b>Figure S6</b> First hydrogenation path from CH <sub>2</sub> CH to CH <sub>2</sub> CH <sub>2</sub> and CH <sub>2</sub> CH <sub>3</sub>                                                                                                 | S9  |
| <b>Figure S7</b> Second hydrogenation path of CH <sub>2</sub> CH to CH <sub>3</sub> CH and CH <sub>3</sub> CH <sub>2</sub>                                                                                                               | S10 |
| <b>Figure S8</b> Ethane formation via ethyl hydrogenation                                                                                                                                                                                | S10 |
| <b>Figure S9</b> Dehydrogenation of CH <sub>3</sub> CH to CH <sub>3</sub> C and competition between CH hydrogenation and CH+CH <sub>3</sub> C coupling                                                                                   | S11 |
| <b>Figure S10</b> Competition of hydrogenation at middle and terminal carbon of CH <sub>3</sub> CCH                                                                                                                                      | S12 |
| <b>Figure S11</b> Formation of propenyl via direct C-C coupling                                                                                                                                                                          | S12 |
| <b>Figure S12</b> Competition of CH <sub>3</sub> CHCH <sub>2</sub> and CH <sub>3</sub> CH <sub>2</sub> CH formation of CH <sub>3</sub> CHCH hydrogenation                                                                                | S13 |
| <b>Figure S13</b> CH <sub>3</sub> CH <sub>2</sub> CH hydrogenation to propyl and competitive hydrogenation of CH <sub>3</sub> CHCH <sub>2</sub> to CH <sub>3</sub> CH <sub>2</sub> CH <sub>2</sub> and CH <sub>3</sub> CHCH <sub>3</sub> | S14 |
| <b>Figure S14</b> Propane formation via propyl hydrogenation                                                                                                                                                                             | S15 |
| <b>Reference</b>                                                                                                                                                                                                                         | S15 |

Table S1 Reactions summary of ethane and propane formation

|    | Reaction                                                                                                                           | $E_a/\text{eV}$ | $E_a+E_{\text{zpe}}/\text{eV}$ | $(E_a+E_{\text{ZPE}})/\text{eV}$ | $E_r/\text{eV}$ | $E_r+E_{\text{zpe}}/\text{eV}$ | $(E_r+E_{\text{ZPE}})/\text{eV}$ | $r(\text{C-H or C-C})/\text{\AA}$ | $r(\text{Fe-H or Fe-C})/\text{\AA}$     | $(\nu/\text{i})/\text{cm}^{-1}$ | $k(550\text{ K})/\text{s}^{-1}$ |
|----|------------------------------------------------------------------------------------------------------------------------------------|-----------------|--------------------------------|----------------------------------|-----------------|--------------------------------|----------------------------------|-----------------------------------|-----------------------------------------|---------------------------------|---------------------------------|
| 1  | $\text{CH}+\text{CH}+12\text{H}+2\text{C}\rightarrow\text{CHCH}+12\text{H}+2\text{C}$                                              | 0.49            | 0.48                           | -0.01                            | -0.36           | -0.32                          | 0.04                             | 1.848                             | 1.864,1.875,2.118;<br>1.910,1.912,2.001 | 536                             | $3.318\times 10^8$              |
| 2  | $\text{CH}+\text{CH}+12\text{H}+2\text{C}\rightarrow\text{CH}_2+\text{CH}+12\text{H}+2\text{C}$                                    | 0.52            | 0.48                           | -0.04                            | 0.44            | 0.48                           | 0.04                             | 1.452                             | 1.580                                   | 737                             | $1.731\times 10^8$              |
| 3  | $\text{CH}_2\text{CH}+12\text{H}+2\text{C}\rightarrow\text{CH}_2\text{CH}_2+11\text{H}+2\text{C}$                                  | 0.52            | 0.47                           | -0.05                            | -0.17           | -0.07                          | 0.10                             | 1.568                             | 1.562                                   | 993                             | $2.109\times 10^8$              |
| 4  | $\text{CH}_2\text{CH}_2+12\text{H}+2\text{C}\rightarrow\text{CH}_2\text{CH}_3+11\text{H}+2\text{C}$                                | 0.51            | 0.43                           | -0.08                            | 0.15            | 0.19                           | 0.04                             | 1.548                             | 1.630, 2.134                            | 787                             | $2.588\times 10^8$              |
| 5  | $\text{CH}_2\text{CH}+12\text{H}+2\text{C}\rightarrow\text{CH}_3\text{CH}+11\text{H}+2\text{C}$                                    | 0.48            | 0.43                           | -0.05                            | 0.03            | 0.09                           | 0.06                             | 1.520                             | 1.624; 2.145                            | 852                             | $4.031\times 10^8$              |
| 6  | $\text{CHCH}_3+12\text{H}+2\text{C}\rightarrow\text{CH}_2\text{CH}_3+11\text{H}+2\text{C}$                                         | 0.60            | 0.56                           | -0.04                            | 0.13            | 0.24                           | 0.11                             | 1.531                             | 1.581; 2.038, 2.010, 2.319              | 940                             | $3.050\times 10^7$              |
| 7  | $\text{CH}_2\text{CH}_3+12\text{H}+2\text{C}\rightarrow\text{CH}_3\text{CH}_3+11\text{H}+2\text{C}$                                | 0.72            | 0.65                           | -0.07                            | -0.58           | -0.52                          | 0.06                             | 1.475                             | 1.642; 2.314                            | 1066                            | $3.182\times 10^6$              |
| 8  | $\text{CH}_3\text{CH}+\text{CH}+11\text{H}+2\text{C}\rightarrow\text{CH}_3\text{C}+\text{CH}+12\text{H}+2\text{C}$                 | 0.03            | -0.06                          | -0.09                            | -0.58           | -0.63                          | 0.05                             | 1.483                             | 1.538                                   | 652                             | $5.604\times 10^{12}$           |
| 9  | $\text{CH}_3\text{C}+\text{CH}+12\text{H}+2\text{C}\rightarrow\text{CH}_3\text{C}+\text{CH}_2+11\text{H}+2\text{C}$                | 0.59            | 0.56                           | -0.03                            | 0.37            | 0.43                           | 0.06                             | 1.494                             | 1.549                                   | 772                             | $4.093\times 10^7$              |
| 10 | $\text{CH}_3\text{C}+\text{CH}+12\text{H}+2\text{C}\rightarrow\text{CH}_3\text{CCH}+11\text{H}+2\text{C}$                          | 0.60            | 0.60                           | 0.00                             | -0.25           | -0.21                          | 0.04                             | 1.880                             | 1.846, 1.866                            | 453                             | $3.219\times 10^7$              |
| 11 | $\text{CH}_3\text{CCH}+12\text{H}+2\text{C}\rightarrow\text{CH}_3\text{CHCH}+11\text{H}+2\text{C}$                                 | 0.49            | 0.44                           | -0.05                            | 0.31            | 0.41                           | 0.10                             | 1.560                             | 1.612                                   | 858                             | $3.519\times 10^8$              |
| 12 | $\text{CH}_3\text{CCH}+12\text{H}+2\text{C}\rightarrow\text{CH}_3\text{CCH}_2+11\text{H}+2\text{C}$                                | 0.82            | 0.77                           | -0.05                            | 0.33            | 0.43                           | 0.10                             | 1.533                             | 1.706                                   | 776                             | $3.633\times 10^5$              |
| 13 | $\text{CH}_3\text{CH}+\text{CH}+12\text{H}+2\text{C}\rightarrow\text{CH}_3\text{CHCH}+12\text{H}+2\text{C}$                        | 0.73            | 0.76                           | 0.03                             | -0.44           | -0.34                          | 0.10                             | 1.931                             | 1.930                                   | 424                             | $2.145\times 10^6$              |
| 14 | $\text{CH}_3\text{CHCH}+12\text{H}+2\text{C}\rightarrow\text{CH}_3\text{CH}_2\text{CH}+11\text{H}+2\text{C}$                       | 0.60            | 0.55                           | -0.05                            | 0.08            | 0.14                           | 0.06                             | 1.511                             | 1.661                                   | 790                             | $3.413\times 10^7$              |
| 15 | $\text{CH}_3\text{CHCH}+12\text{H}+2\text{C}\rightarrow\text{CH}_3\text{CHCH}_2+11\text{H}+2\text{C}$                              | 0.56            | 0.51                           | -0.05                            | 0.04            | 0.14                           | 0.10                             | 1.553                             | 1.568                                   | 996                             | $8.557\times 10^7$              |
| 16 | $\text{CH}_3\text{CH}_2\text{CH}+12\text{H}+2\text{C}\rightarrow\text{CH}_3\text{CH}_2\text{CH}_2+11\text{H}^{\text{a}}+2\text{C}$ | 0.64            | 0.58                           | -0.06                            | 0.25            | 0.34                           | 0.09                             | 1.523                             | 1.575                                   | 930                             | $1.650\times 10^7$              |
| 17 | $\text{CH}_3\text{CHCH}_2+12\text{H}+2\text{C}\rightarrow\text{CH}_3\text{CH}_2\text{CH}_2+11\text{H}^{\text{b}}+2\text{C}$        | 0.61            | 0.55                           | -0.06                            | 0.28            | 0.33                           | 0.05                             | 1.505                             | 1.641;2.187                             | 890                             | $3.018\times 10^7$              |
| 18 | $\text{CH}_3\text{CHCH}_2+12\text{H}+2\text{C}\rightarrow\text{CH}_3\text{CHCH}_3+11\text{H}+2\text{C}$                            | 1.38            | 1.31                           | -0.07                            | 0.25            | 0.32                           | 0.07                             | 1.479                             | 1.569                                   | 1063                            | 2.625                           |
| 19 | $\text{CH}_3\text{CH}_2\text{CH}_2+12\text{H}+2\text{C}\rightarrow\text{CH}_3\text{CH}_2\text{CH}_3+11\text{H}+2\text{C}$          | 0.67            | 0.62                           | -0.05                            | -0.68           | -0.62                          | 0.06                             | 1.517                             | 1.658; 2.335                            | 1075                            | $8.128\times 10^6$              |

Table S2 Temperature effects on the reaction energies of ethylene and ethane formation

| Reaction 3: CH <sub>2</sub> CH+12H+2C→CH <sub>2</sub> CH <sub>2</sub> +11H+2C |                      |                                             |                                                             | Reaction 7: CH <sub>3</sub> CH <sub>2</sub> +12H+2C→CH <sub>3</sub> CH <sub>3</sub> +11H+2C |                      |                                             |                                                             |
|-------------------------------------------------------------------------------|----------------------|---------------------------------------------|-------------------------------------------------------------|---------------------------------------------------------------------------------------------|----------------------|---------------------------------------------|-------------------------------------------------------------|
| $\Delta E_{\text{elec}}/\text{eV}$                                            |                      | -0.166                                      |                                                             | $\Delta E_{\text{elec}}/\text{eV}$                                                          |                      | -0.582                                      |                                                             |
| $\Delta(E_{\text{elec}}+E_{\text{ZPE}})$                                      |                      | -0.068                                      |                                                             | $\Delta(E_{\text{elec}}+E_{\text{ZPE}})$                                                    |                      | -0.517                                      |                                                             |
| $\Delta H \sim T$                                                             |                      |                                             |                                                             | $\Delta H \sim T$                                                                           |                      |                                             |                                                             |
| $T/\text{K}$                                                                  | $\Delta H/\text{eV}$ | $\Delta H-\Delta E_{\text{elec}}/\text{eV}$ | $\Delta H-\Delta(E_{\text{elec}}-E_{\text{ZPE}})/\text{eV}$ | $T/\text{K}$                                                                                | $\Delta H/\text{eV}$ | $\Delta H-\Delta E_{\text{elec}}/\text{eV}$ | $\Delta H-\Delta(E_{\text{elec}}-E_{\text{ZPE}})/\text{eV}$ |
|                                                                               |                      | V                                           | V                                                           |                                                                                             |                      | V                                           | V                                                           |
| 250                                                                           | -0.054               | 0.112                                       | 0.014                                                       | 250                                                                                         | -0.496               | 0.086                                       | 0.021                                                       |
| 300                                                                           | -0.053               | 0.113                                       | 0.015                                                       | 300                                                                                         | -0.496               | 0.086                                       | 0.021                                                       |
| 350                                                                           | -0.052               | 0.114                                       | 0.016                                                       | 350                                                                                         | -0.498               | 0.084                                       | 0.019                                                       |
| 400                                                                           | -0.052               | 0.114                                       | 0.016                                                       | 400                                                                                         | -0.500               | 0.082                                       | 0.017                                                       |
| 450                                                                           | -0.053               | 0.113                                       | 0.015                                                       | 450                                                                                         | -0.504               | 0.078                                       | 0.013                                                       |
| 500                                                                           | -0.054               | 0.112                                       | 0.014                                                       | 500                                                                                         | -0.508               | 0.074                                       | 0.009                                                       |
| 550                                                                           | -0.055               | 0.111                                       | 0.013                                                       | 550                                                                                         | -0.513               | 0.069                                       | 0.004                                                       |
| 600                                                                           | -0.057               | 0.109                                       | 0.011                                                       | 600                                                                                         | -0.518               | 0.064                                       | -0.001                                                      |

The formation enthalpy ( $\Delta H$ ) of reaction is composed by three parts: the electronic energy ( $E_{\text{elec}}$ ), the zero point correction ( $E_{\text{ZPE}}$ ), the integration of heat capacity at constant volume from 0 K to real temperature. (Grabow, Lars C. "Computational catalyst screening. "Computational Catalysis, RSC Publishing, 2013, 1-58.):

$$H(T) = E_{\text{elec}} + E_{\text{ZPE}} + \int_{0\text{K}}^T C_v d\tilde{T} \quad (\text{Equation S1})$$

$$E_{\text{ZPE}} = \frac{1}{2} \sum_{i=0}^{\text{DOF}} h\nu_i \quad (\text{Equation S2})$$

$$\int_{0\text{K}}^T C_v d\tilde{T} = \sum_{i=0}^{\text{DOF}} \frac{h\nu_i}{e^{\frac{h\nu_i}{k_B T}} - 1} \quad (\text{Equation S3})$$

The results were presented in the Table S1. By comparing  $\Delta E_{\text{elec}}$  and  $\Delta H$ , we concluded that temperature has little effect on the reaction energy ( $\leq 0.11$  eV).

Table S3. Structure parameters as carbon coverage variation on (4×4) Fe(110)

| ML                        |                | $r(\text{Fe-C})^a/\text{\AA}$ | $r(\text{Fe-C})^b/\text{\AA}$ | $r(\text{Fe}_{\text{sub}}\text{-C})^c/\text{\AA}$ | $\angle\text{Fe-Fe-Fe}$ | $r(\text{Fe-Fe})/\text{\AA}$ |
|---------------------------|----------------|-------------------------------|-------------------------------|---------------------------------------------------|-------------------------|------------------------------|
| 0.00 ML/C                 |                |                               |                               |                                                   | 70.53°                  | 2.452                        |
| 0.0625 ML/C               | C              | 1.797, 1.797                  | 1.955, 1.956                  | 2.392                                             | 84.51°                  | 2.578                        |
| 0.25 ML/C                 | C <sup>1</sup> | 1.790, 1.790                  | 1.954, 1.954                  | 2.606                                             | 83.41°                  | 2.507, 2.507, 2.507, 2.507   |
|                           | C <sup>2</sup> | 1.789, 1.790                  | 1.954, 1.953                  | 2.604                                             | 83.42°                  | 2.508, 2.508, 2.508, 2.508   |
|                           | C <sup>3</sup> | 1.790, 1.789                  | 1.954, 1.954                  | 2.603                                             | 83.40°                  | 2.508, 2.508, 2.507, 2.508   |
|                           | C <sup>4</sup> | 1.790, 1.790                  | 1.954, 1.953                  | 2.606                                             | 83.41°                  | 2.507, 2.507, 2.507, 2.507   |
| 0.25 ML/C + 0.75 ML/H     | C <sup>1</sup> | 1.764, 1.770                  | 1.858, 1.904                  | 2.013                                             |                         | 2.570, 2.566, 2.591, 2.595   |
|                           | C <sup>2</sup> | 1.733, 1.757                  | 1.920, 1.941                  | 2.535                                             |                         | 2.519, 2.499, 2.466, 2.538   |
|                           | C <sup>3</sup> | 1.738, 1.736                  | 1.872, 1.928                  | 2.066                                             |                         | 2.557, 2.512, 2.670, 2.552   |
|                           | C <sup>4</sup> | 1.877, 1.812                  | 1.893, 1.911                  | 1.853                                             |                         | 2.473, 2.630, 2.607, 2.487   |
| C/(2×2)(110) <sup>1</sup> |                | 1.787                         | 1.955                         | 2.594                                             |                         |                              |

(a) Fe-C distance along the short diagonal line. (b) Fe-C distance along the long diagonal line. (c) Fe-C distance of C and subsurface Fe

Table S4 Comparison of the barriers and reaction energies under high and low coverage

| High coverage                                                                                       |                 |                 | Low coverage <sup>2</sup>                                          |                 |                 |
|-----------------------------------------------------------------------------------------------------|-----------------|-----------------|--------------------------------------------------------------------|-----------------|-----------------|
| Reaction                                                                                            | $E_a/\text{eV}$ | $E_r/\text{eV}$ | Reaction                                                           | $E_a/\text{eV}$ | $E_r/\text{eV}$ |
| $\text{CH}+\text{CH}+12\text{H}+2\text{C}\rightarrow\text{CHCH}+12\text{H}+2\text{C}$               | 0.49            | -0.36           | $\text{CH}+\text{CH}\rightarrow\text{CHCH}$                        | 0.61            | -0.36           |
| $\text{CH}+\text{CH}+12\text{H}+2\text{C}\rightarrow\text{CH}_2+\text{CH}+12\text{H}+2\text{C}$     | 0.52            | 0.44            | $\text{CH}+\text{H}\rightarrow\text{CH}_2$                         | 0.74            | 0.71            |
| $\text{CH}_2\text{CH}+12\text{H}+2\text{C}\rightarrow\text{CH}_2\text{CH}_2+11\text{H}+2\text{C}$   | 0.52            | -0.17           | $\text{CH}_2\text{CH}+\text{H}\rightarrow\text{CH}_2\text{CH}_2$   | 0.72            | 0.36            |
| $\text{CH}_2\text{CH}_2+12\text{H}+2\text{C}\rightarrow\text{CH}_2\text{CH}_3+11\text{H}+2\text{C}$ | 0.51            | 0.15            | $\text{CH}_2\text{CH}_2+\text{H}\rightarrow\text{CH}_2\text{CH}_3$ | 0.65            | 0.51            |
| $\text{CHCH}_3+12\text{H}+2\text{C}\rightarrow\text{CH}_2\text{CH}_3+11\text{H}+2\text{C}$          | 0.60            | 0.13            | $\text{CHCH}_3\rightarrow\text{CH}_2\text{CH}_3$                   | 0.80            | 0.39            |
| $\text{CH}_2\text{CH}_3+12\text{H}+2\text{C}\rightarrow\text{CH}_3\text{CH}_3+11\text{H}+2\text{C}$ | 0.72            | -0.58           | $\text{CH}_2\text{CH}_3+\text{H}\rightarrow\text{CH}_3\text{CH}_3$ | 1.13            | 0.28            |

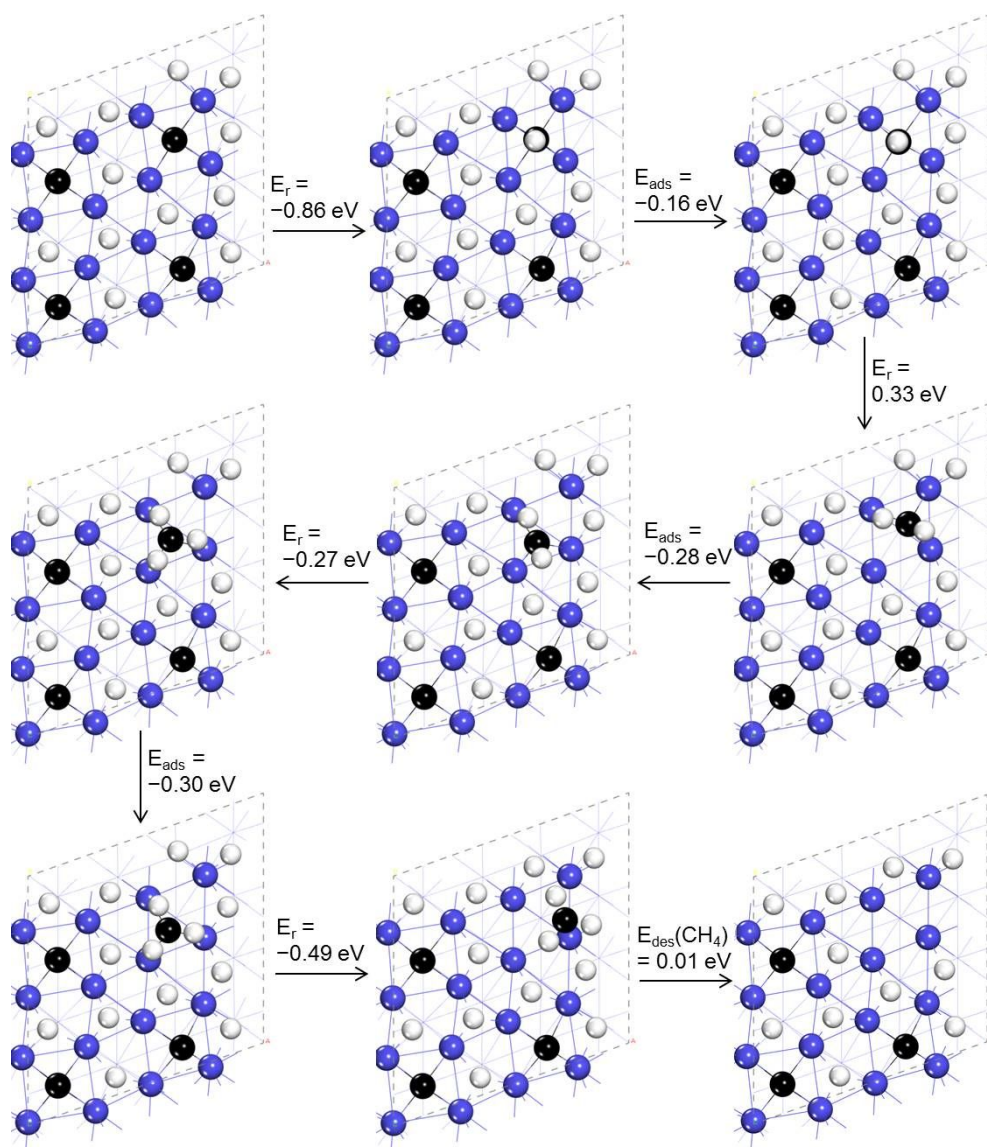

Figure S1 Thermodynamic properties of stepwise hydrogenation to methane of surface carbon including hydrogen adsorption and methane desorption

Note: blue balls are iron, black balls are carbon and white balls are hydrogen

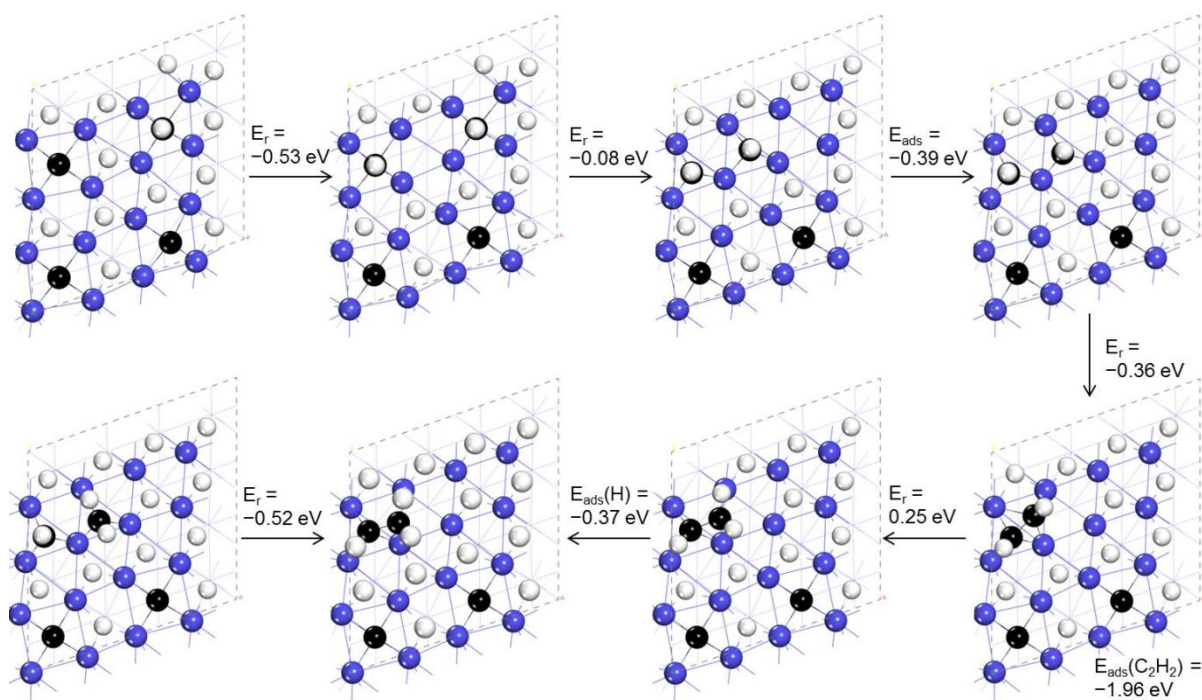

Figure S2 Thermodynamic properties of CH-CH coupling and hydrogenation to CH<sub>2</sub>CH as well as CH<sub>2</sub>+CH coupling

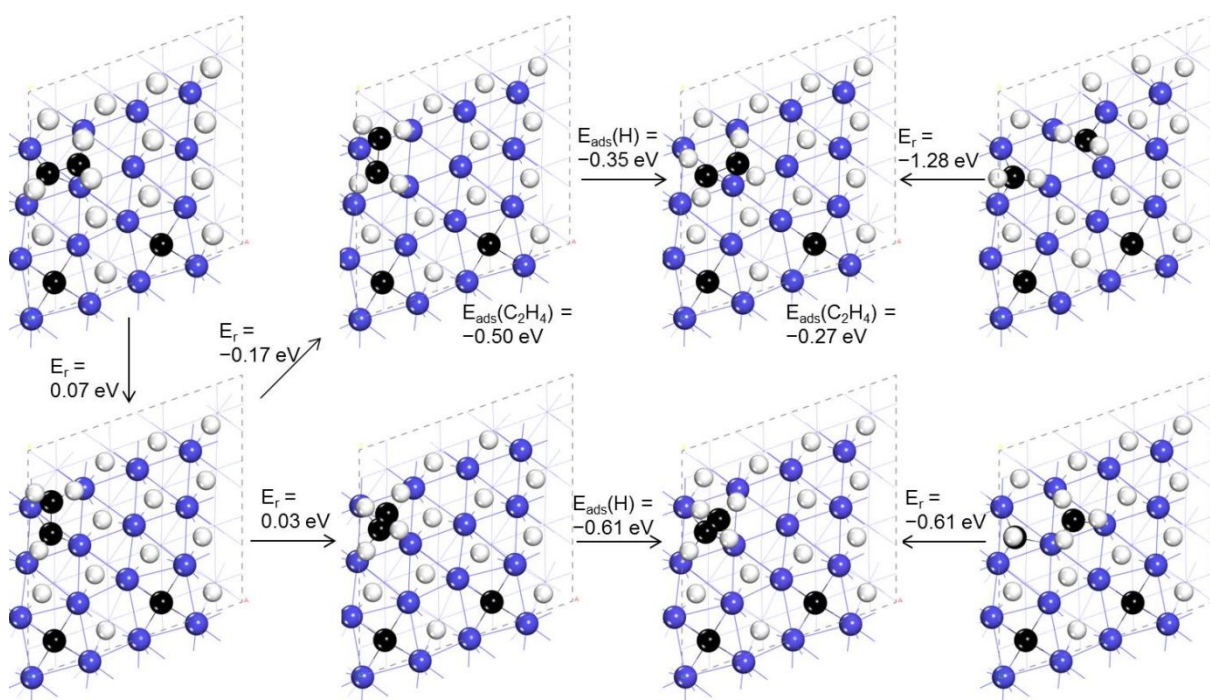

Figure S3 Thermodynamic properties of ethylene and CH<sub>3</sub>CH formation



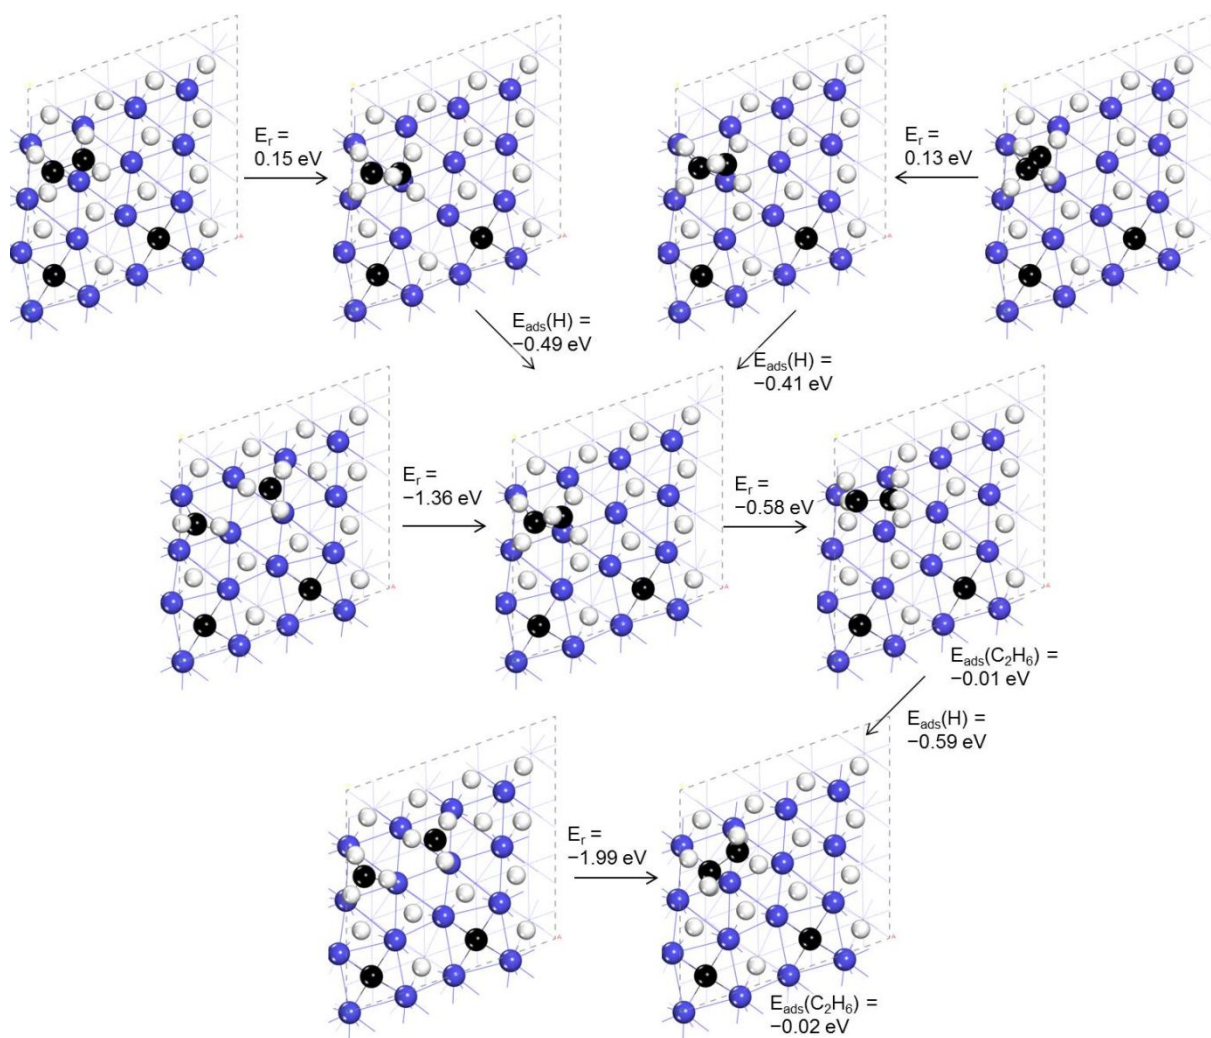

Figure S4 Thermodynamic properties of ethylene stepwise hydrogenation to ethane and coupling of two  $\text{CH}_3$

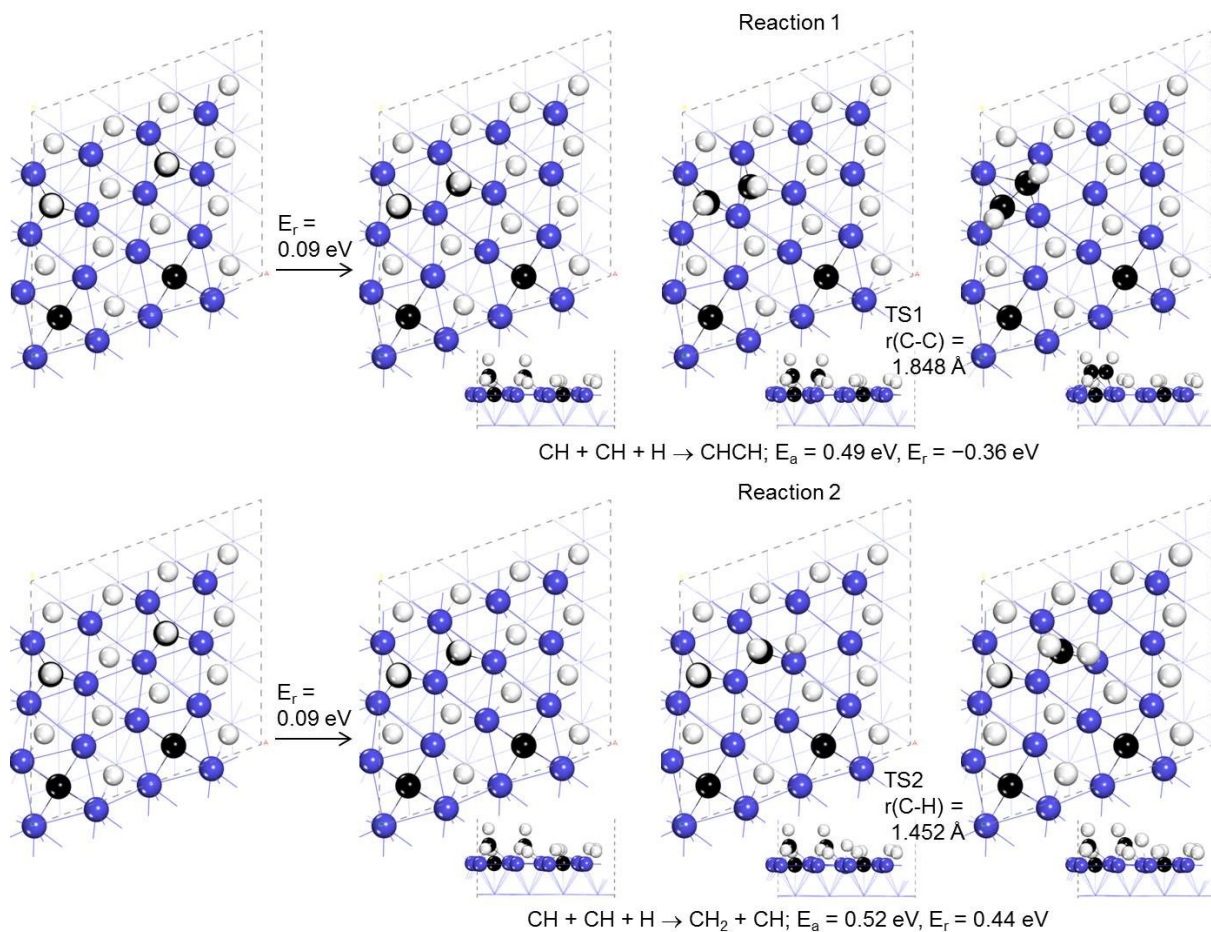

Figure S5 Reactions of CH+CH coupling to acetylene and CH hydrogenation



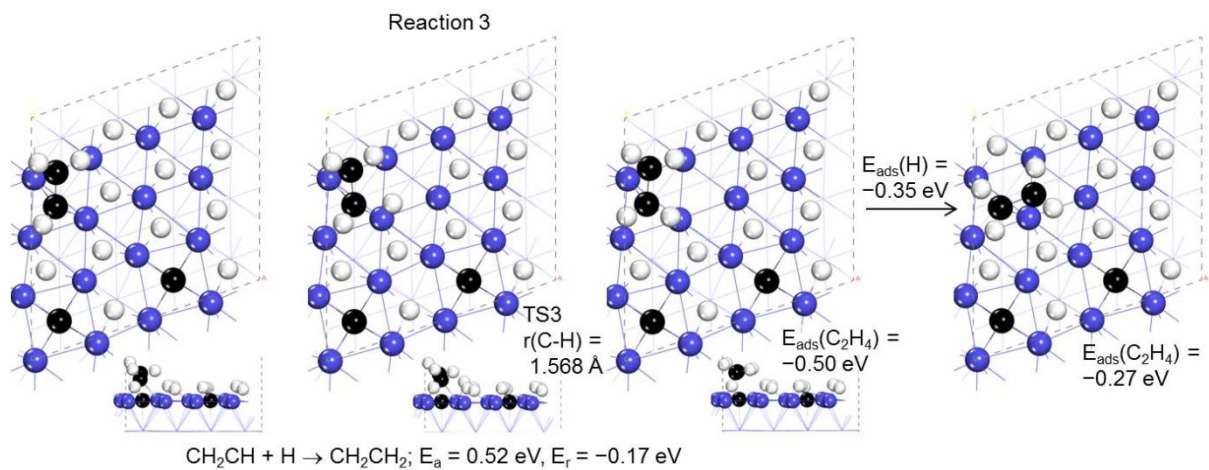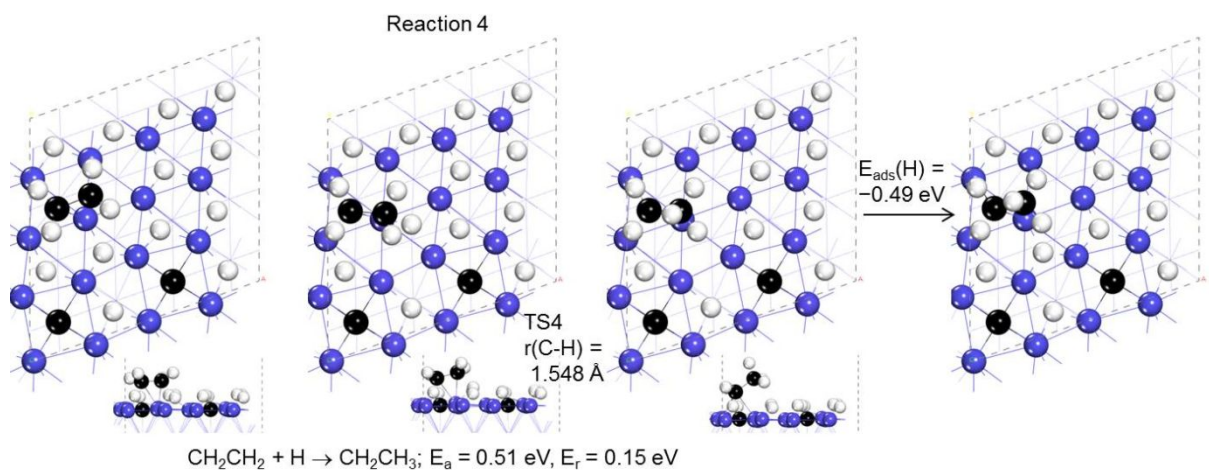

Figure S6 First hydrogenation path from  $\text{CH}_2\text{CH}$  to  $\text{CH}_2\text{CH}_2$  and  $\text{CH}_2\text{CH}_3$

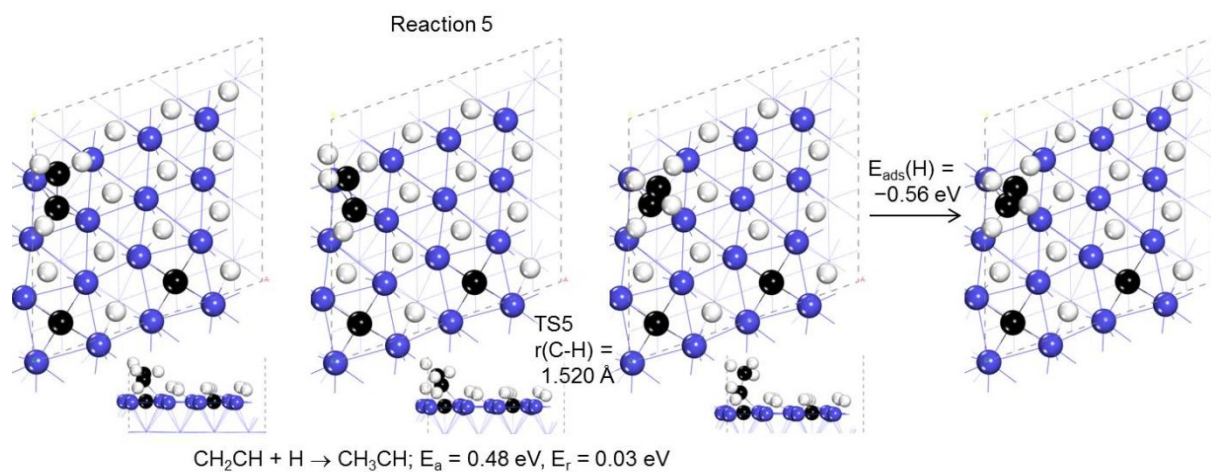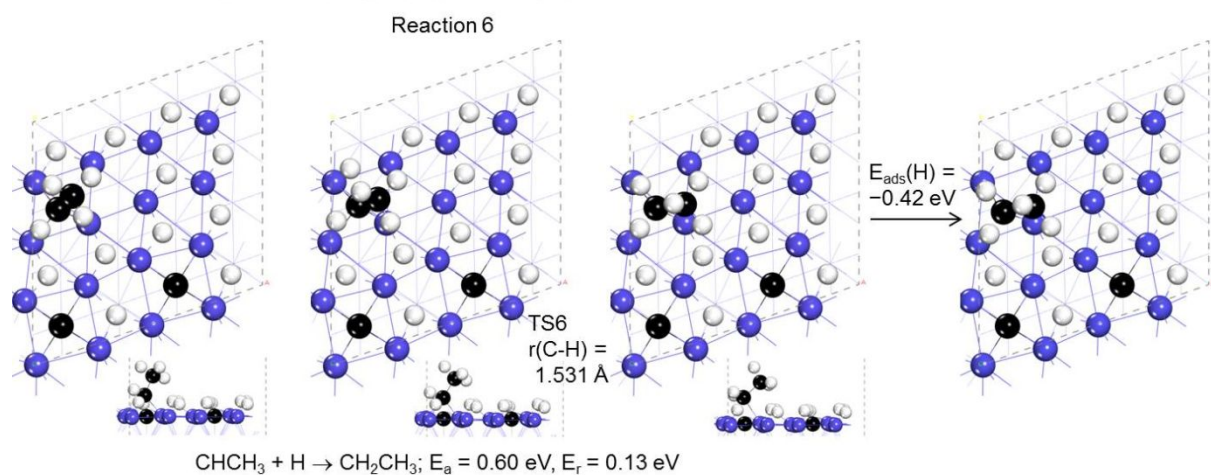

Figure S7 Second hydrogenation path of  $\text{CH}_2\text{CH}$  to  $\text{CH}_3\text{CH}$  and  $\text{CH}_3\text{CH}_2$

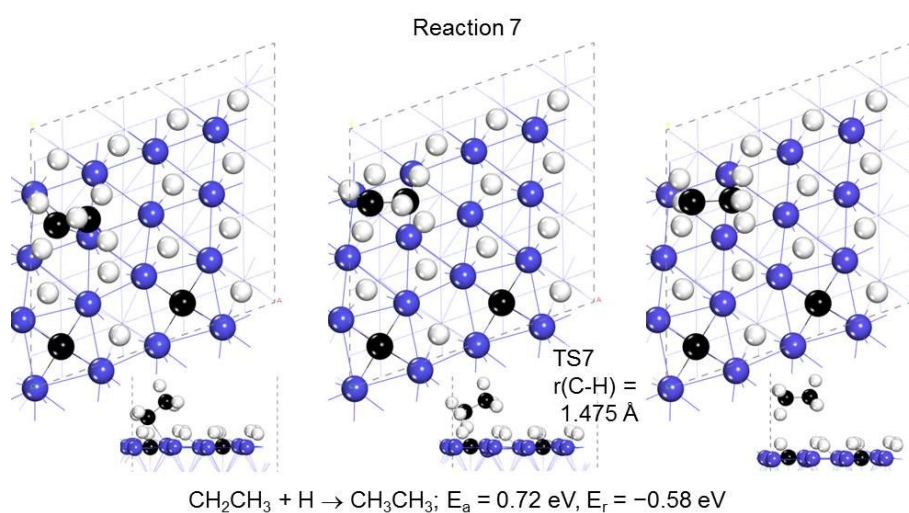

Figure S8 Ethane formation via ethyl hydrogenation



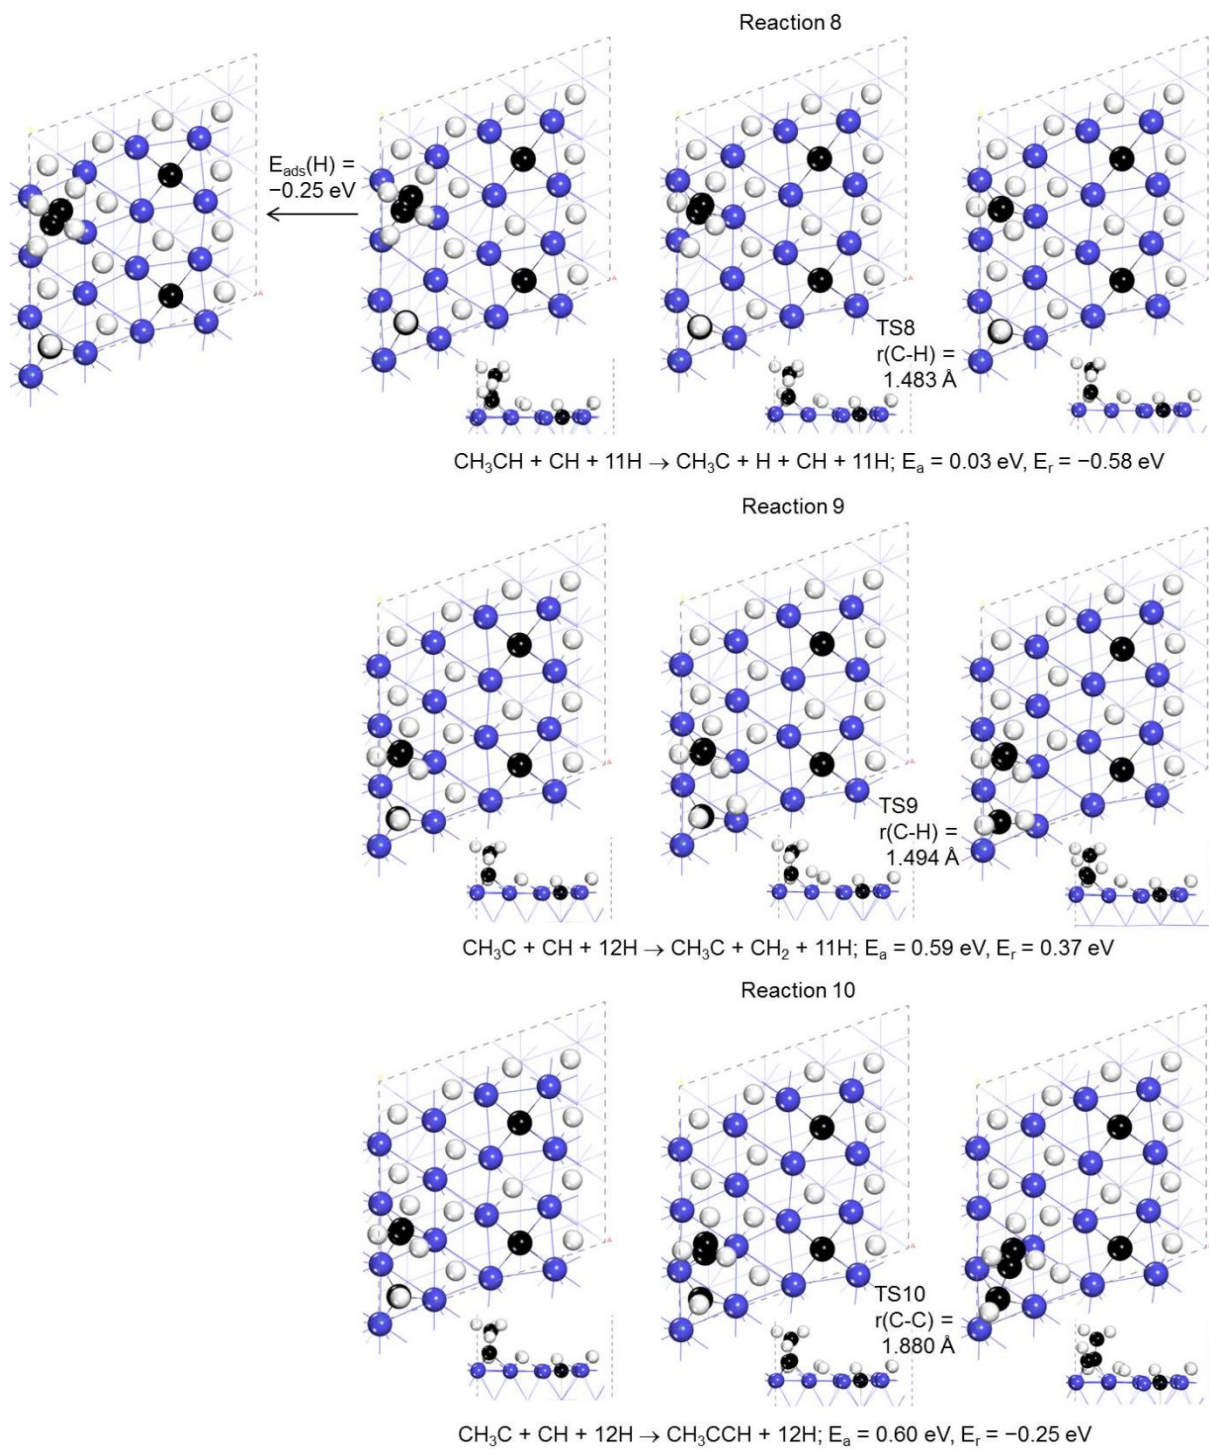

Figure S9 Dehydrogenation of  $\text{CH}_3\text{CH}$  to  $\text{CH}_3\text{C}$  and competition between CH hydrogenation and CH+ $\text{CH}_3\text{C}$  coupling

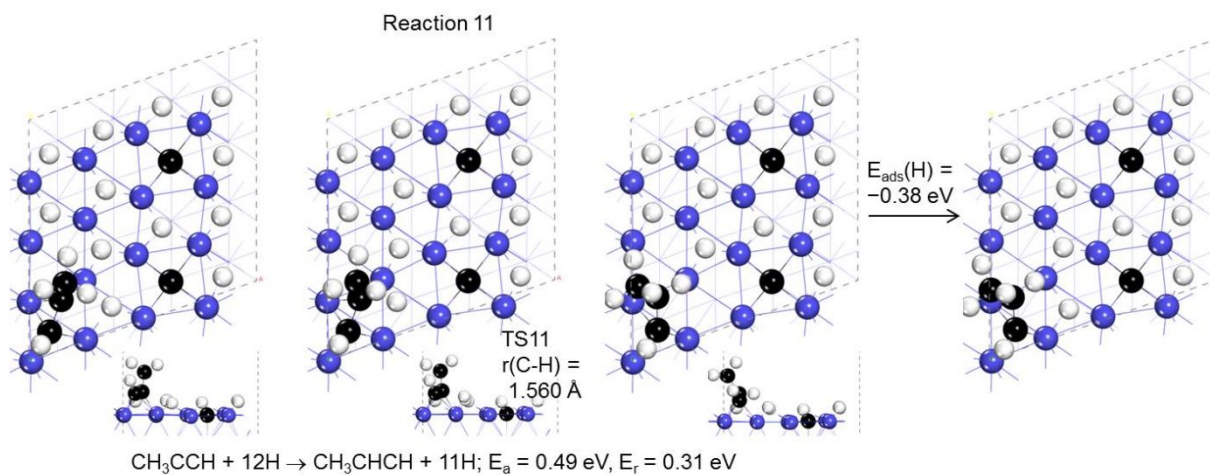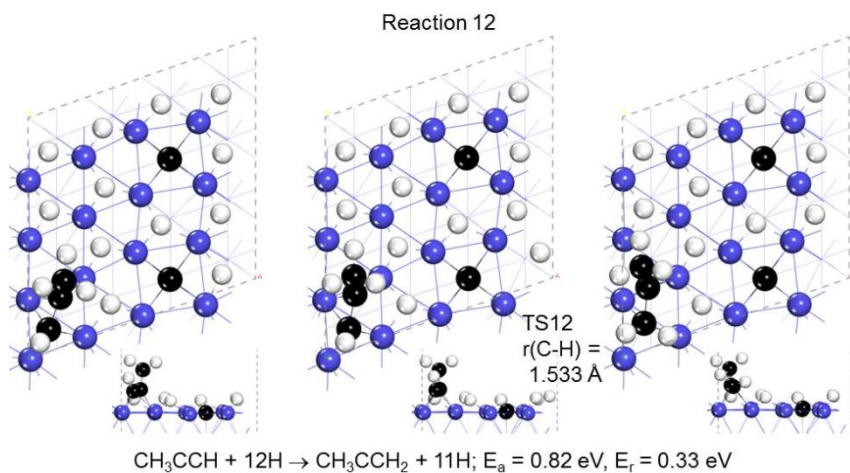

Figure S10 Competition of hydrogenation at middle and terminal carbon of  $\text{CH}_3\text{CCH}$

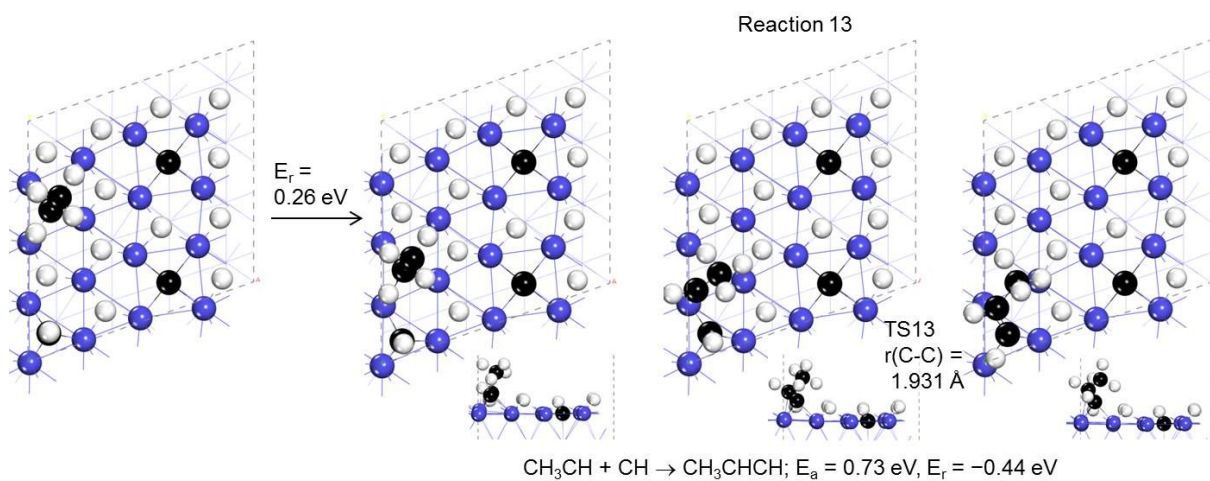

Figure S11 Formation of propenyl via direct C-C coupling

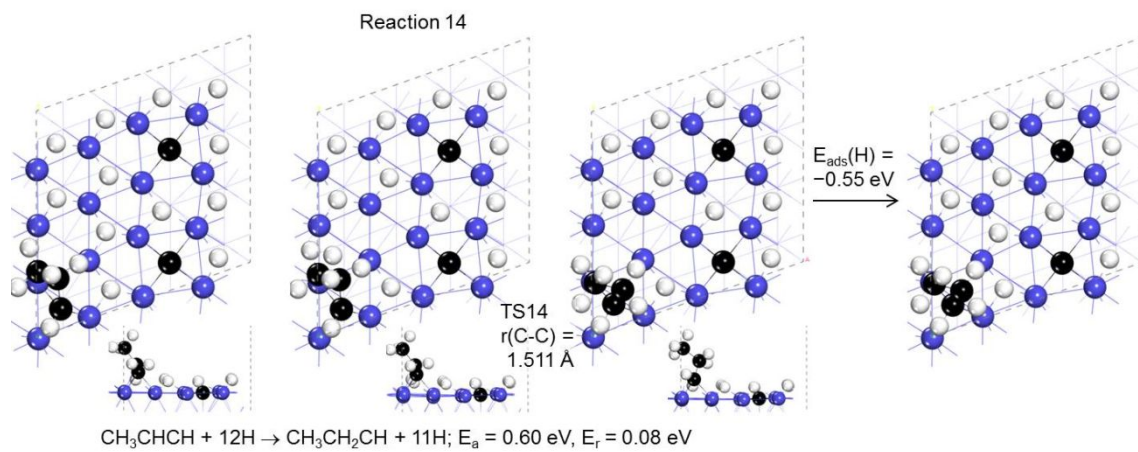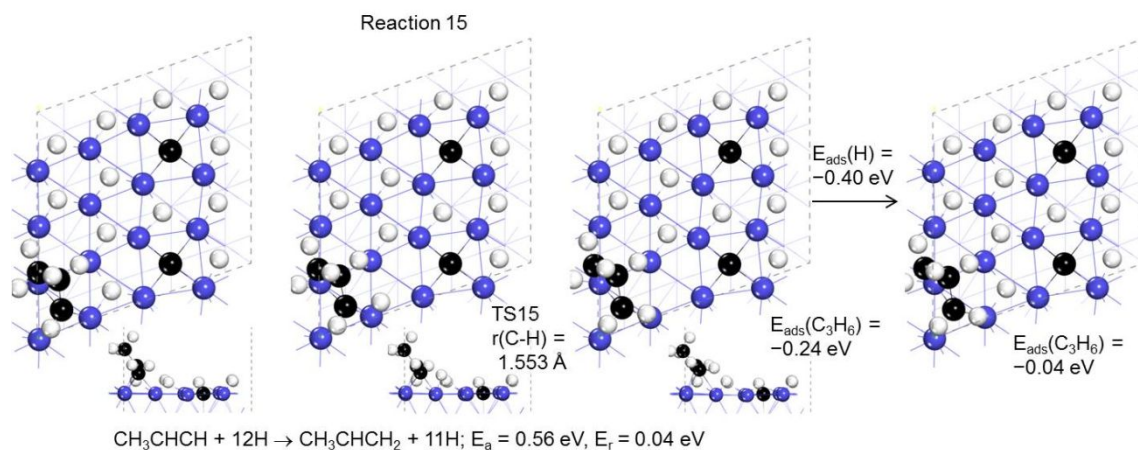

Figure S12 Competition of  $\text{CH}_3\text{CHCH}_2$  and  $\text{CH}_3\text{CH}_2\text{CH}$  formation of  $\text{CH}_3\text{CHCH}$  hydrogenation



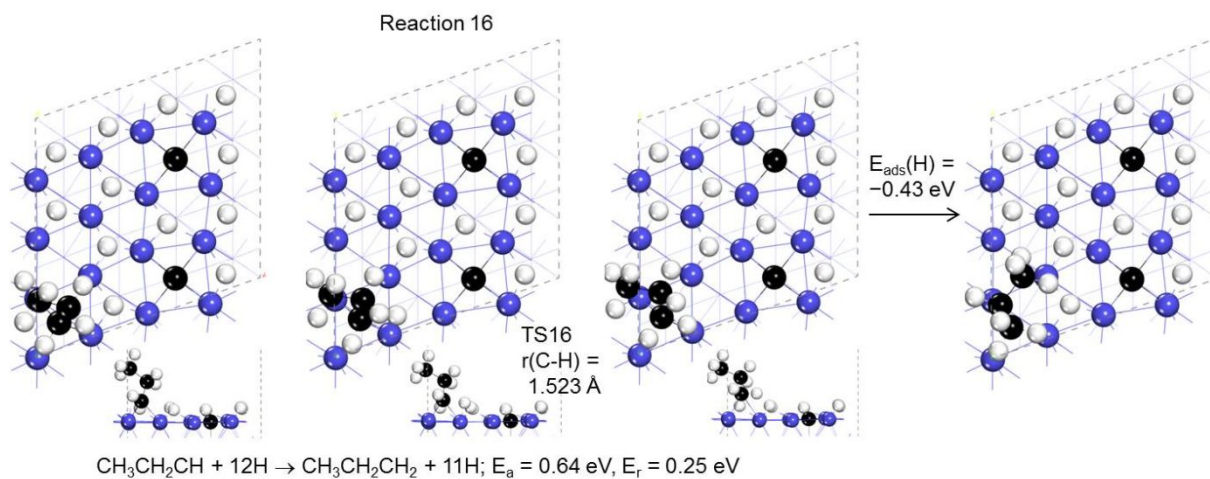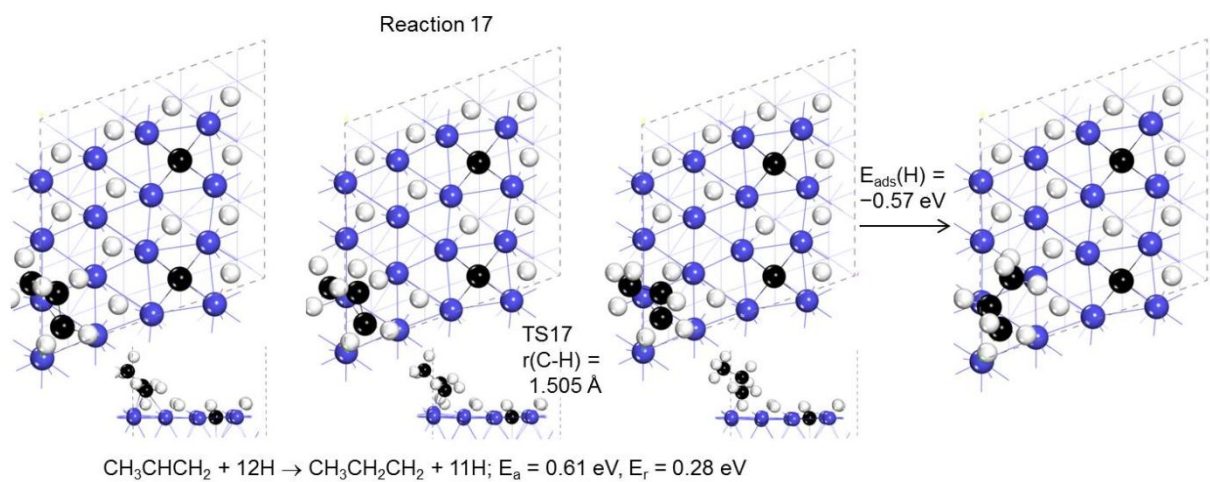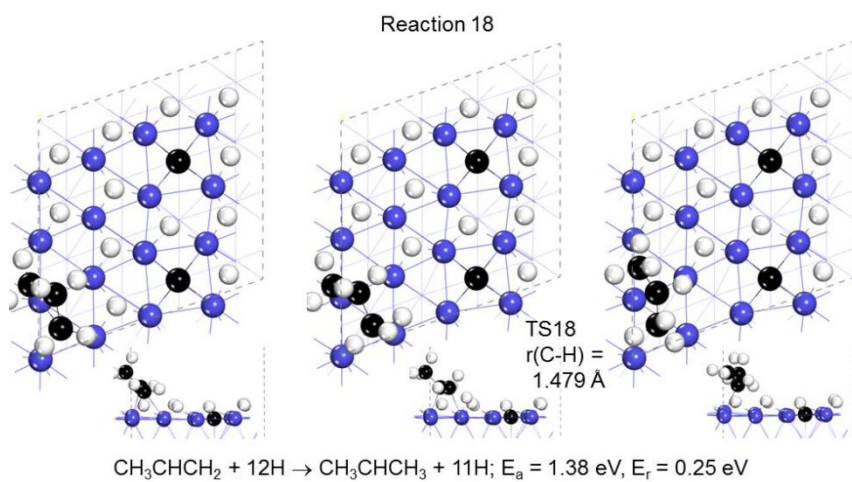

Figure S13  $\text{CH}_3\text{CH}_2\text{CH}$  hydrogenation to propyl and competitive hydrogenation of  $\text{CH}_3\text{CHCH}_2$  to  $\text{CH}_3\text{CH}_2\text{CH}_2$  and  $\text{CH}_3\text{CHCH}_3$

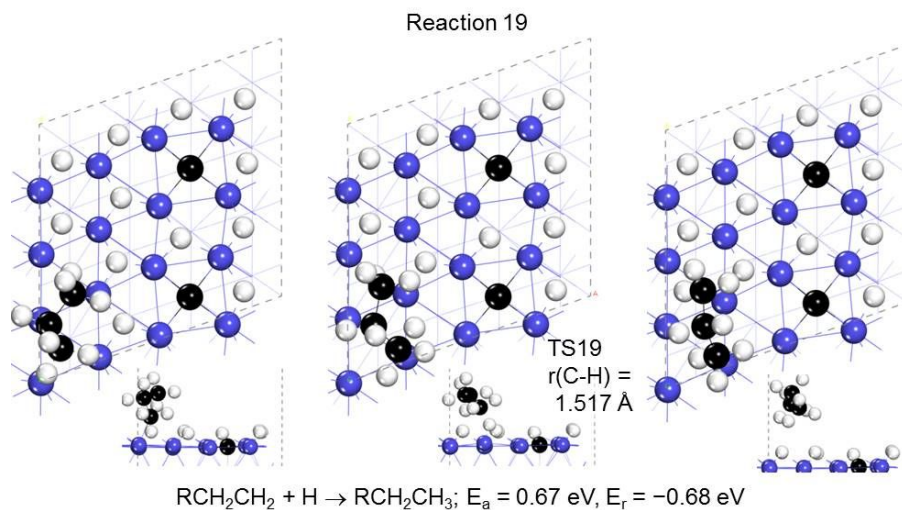

Figure S14 Propane formation via propyl hydrogenation

#### Reference

- (1) Liu, X.-W.; Huo, C.-F.; Li, Y.-W.; Wang, J.; Jiao, H., Energetics of Carbon Deposition on Fe(100) and Fe(110) Surfaces and Subsurfaces. *Surf. Sci.* **2012**, 606, 733-739.
- (2) Li, T.; Wen, X.; Li, Y.-W.; Jiao, H., Successive Dissociation of CO, CH<sub>4</sub>, C<sub>2</sub>H<sub>6</sub>, and CH<sub>3</sub>CHO on Fe(110): Retrosynthetic Understanding of FTS Mechanism. *J. Phys. Chem. C* **2018**, 122, 28846-28855.
